# Supplementary material
Source: PubMed Central journal article supplement (PMC2869535)

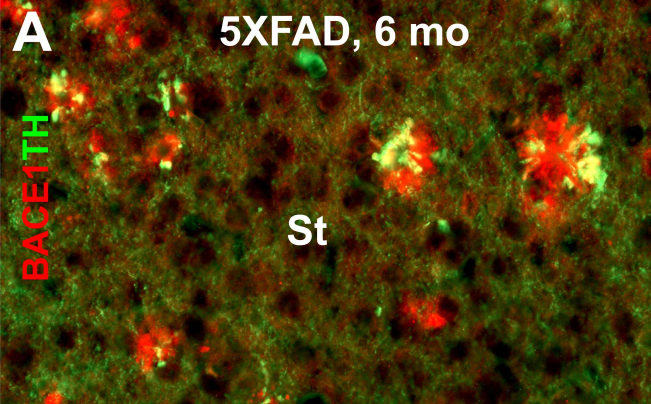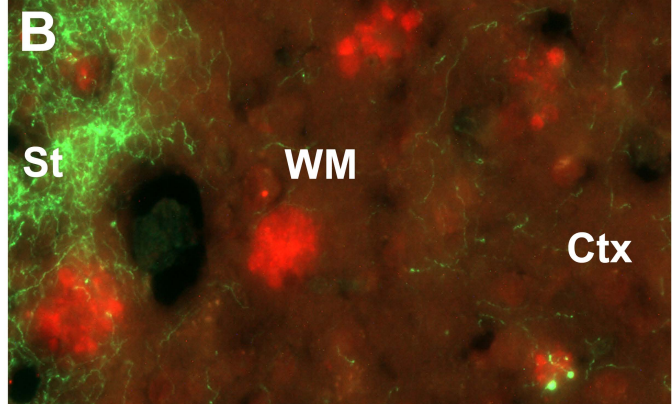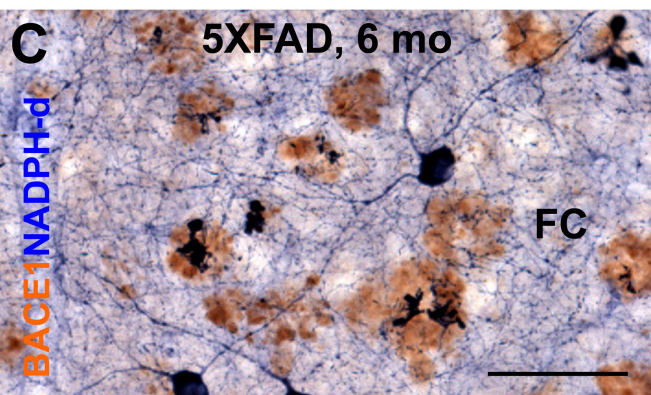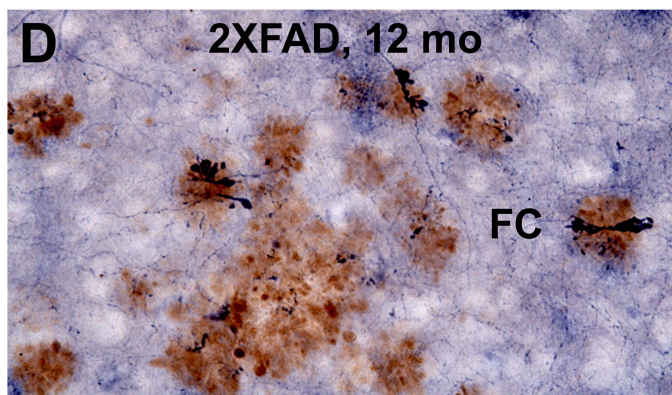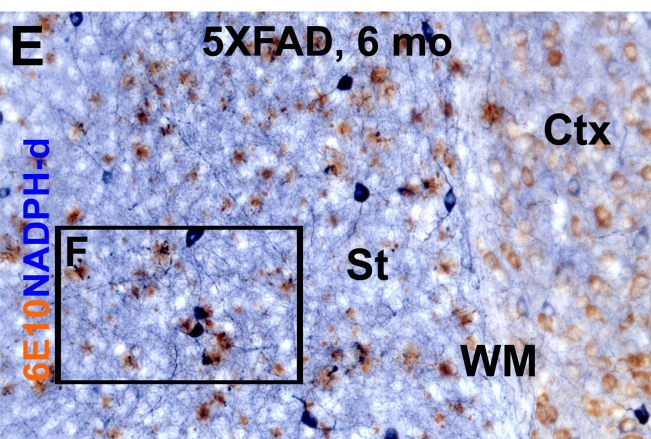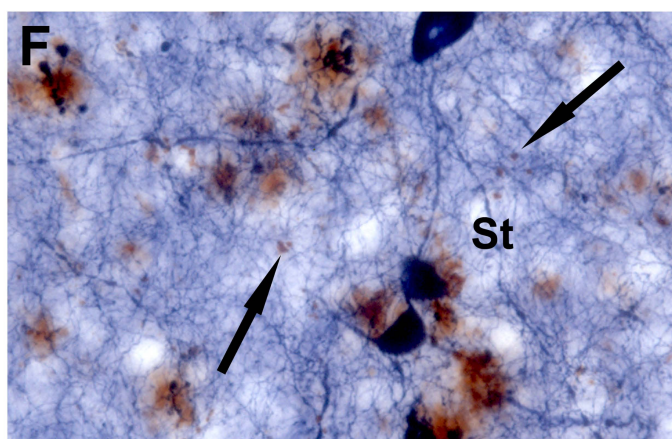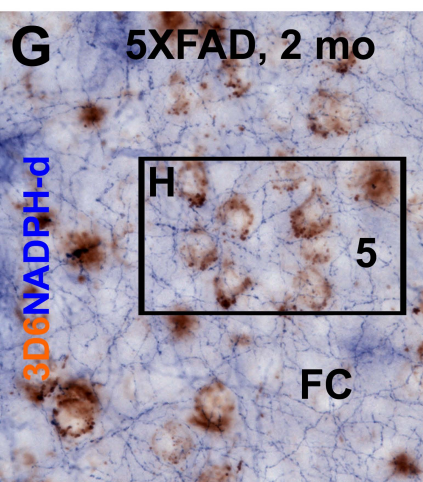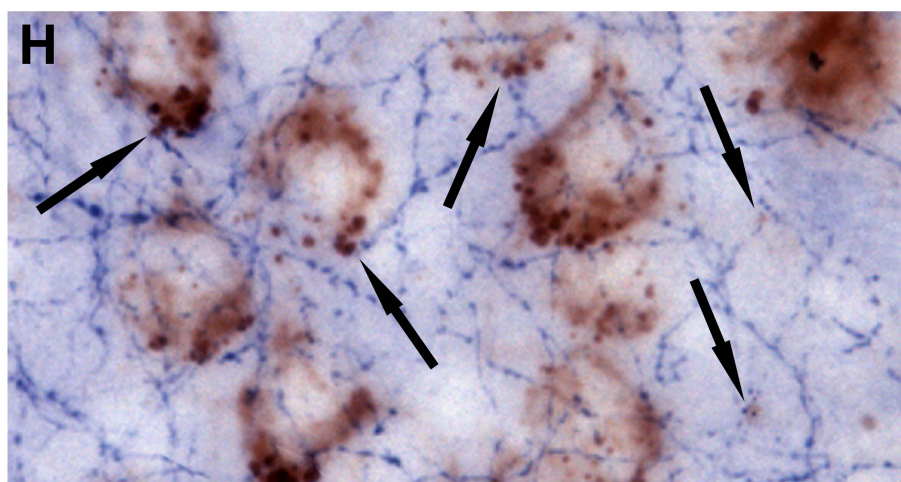

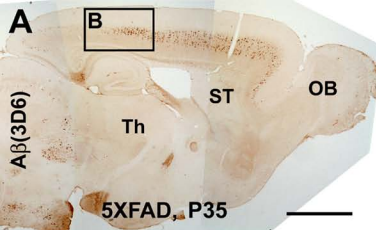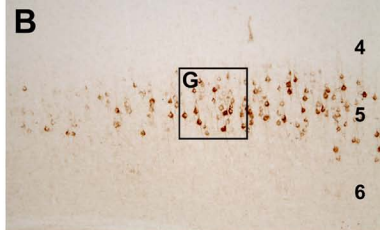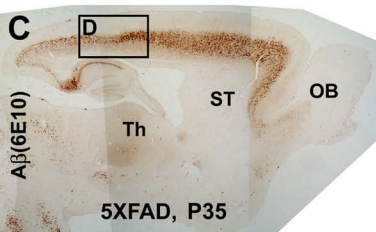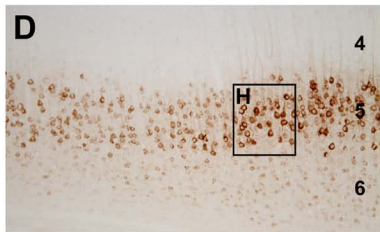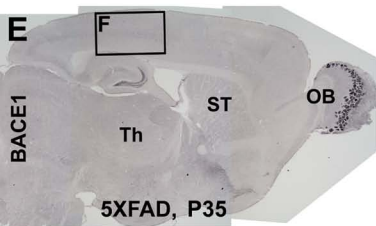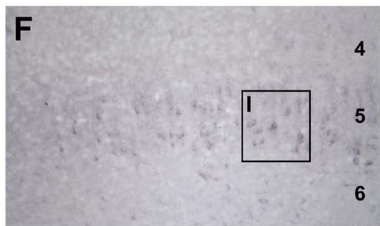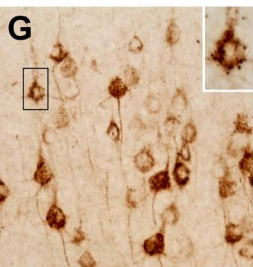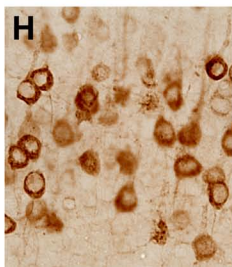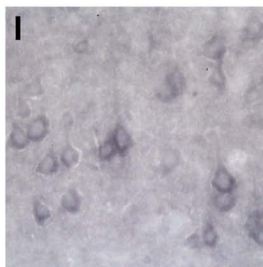

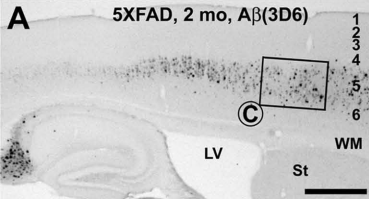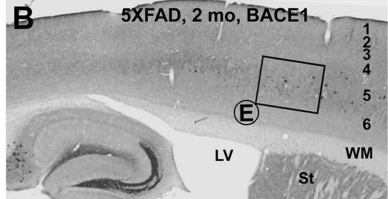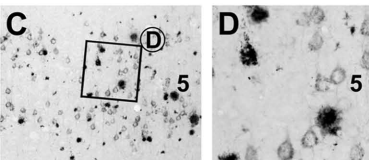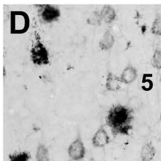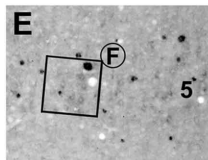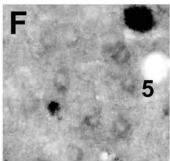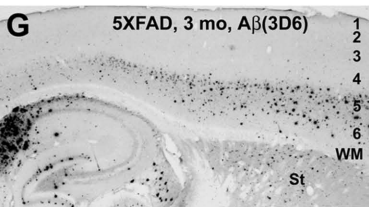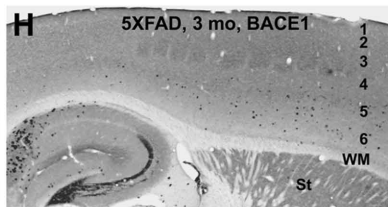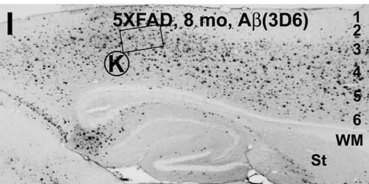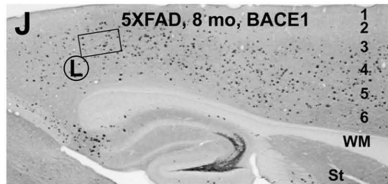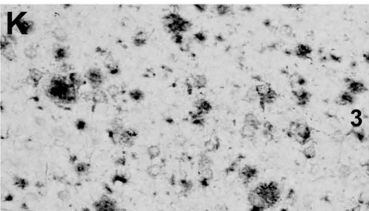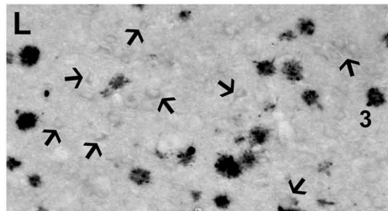

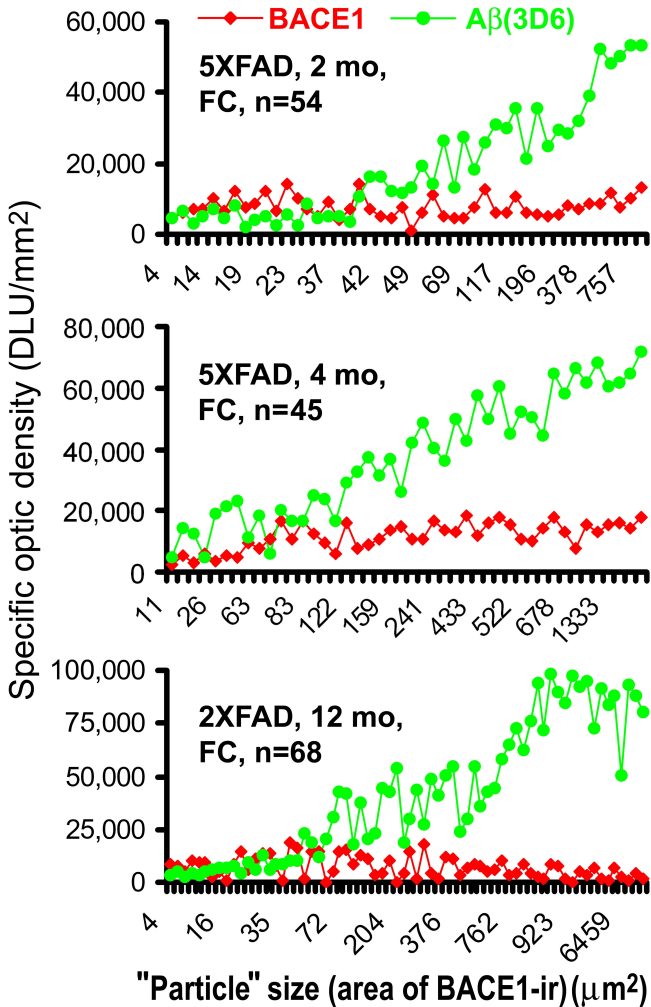

Supplement: NIHMS195568-supplement-Supplementary_Figures.pdf [file NIHMS195568-supplement-Supplementary_Figures.pdf]
